# Supplementary material
Source: PubMed Central journal article supplement (PMC9077323)
Supplement: mmc1.pdf [file mmc1.pdf]

YMTHE, Volume 30

## **Supplemental Information**

**RNA m<sup>6</sup>A methylation regulates dissemination  
of cancer cells by modulating expression  
and membrane localization of  $\beta$ -catenin**

**Jiexin Li, Guoyou Xie, Yifan Tian, Wanglin Li, Yingmin Wu, Feng Chen, Yu Lin, Xinyao Lin, Shannon Wing-Ngor Au, Jie Cao, Weiling He, and Hongsheng Wang**

**Supplementary information for**

**RNA m<sup>6</sup>A methylation regulates the dissemination of cancer cells via  
modulating expression and membrane localization of  $\beta$ -catenin**

**Jiexin LI, et al**

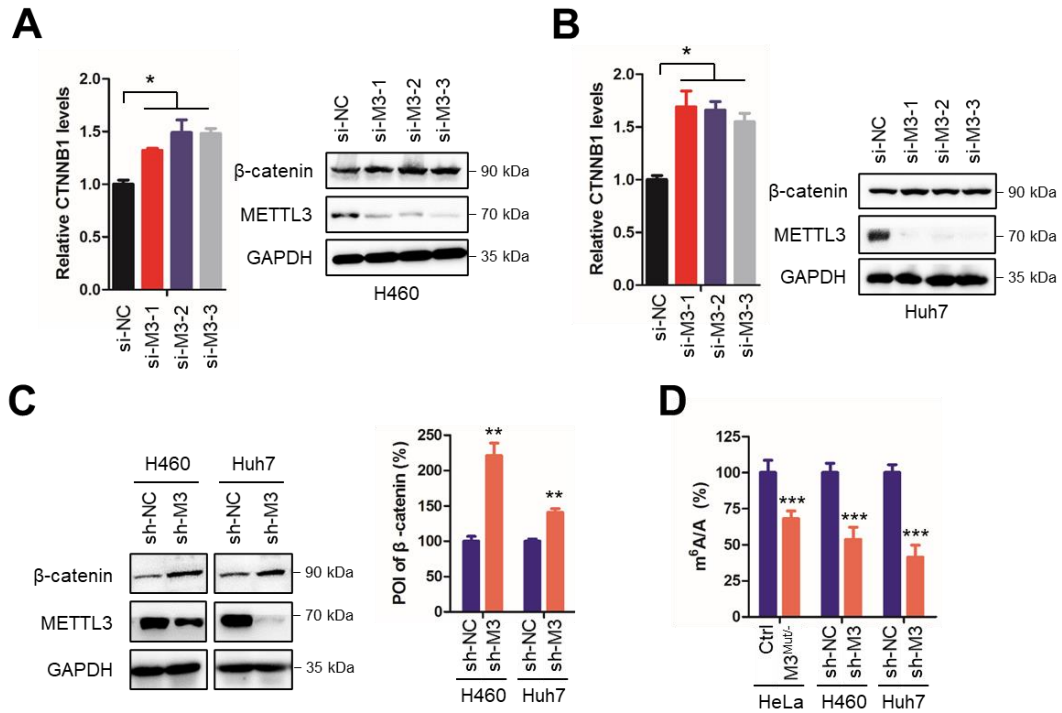

**Fig.S1 Expression of *CTNNB1* is associated to *METTL3* in lung cancer and liver cancer.**

(A-B) Expression levels of *CTNNB1* mRNA (*left*) and  $\beta$ -catenin protein (*right*) in H460 cells (A) and Huh7 cells (B) silencing *METTL3* were detected by RT-qPCR and Western blot, respectively;

(C) Protein levels of  $\beta$ -catenin in H460 sh-NC, H460 sh-*METTL3*, Huh7 sh-NC and Huh7 sh-*METTL3* cells were detected by Western blot (*left*) and quantitatively analyzed (*right*);

(D) m<sup>6</sup>A methylation levels of HeLa, HeLa *METTL3*<sup>Mut/-</sup>, H460 sh-NC, H460 sh-*METTL3*, Huh7 sh-NC and Huh7 sh-*METTL3* cells were detected by LC-MS/MS.

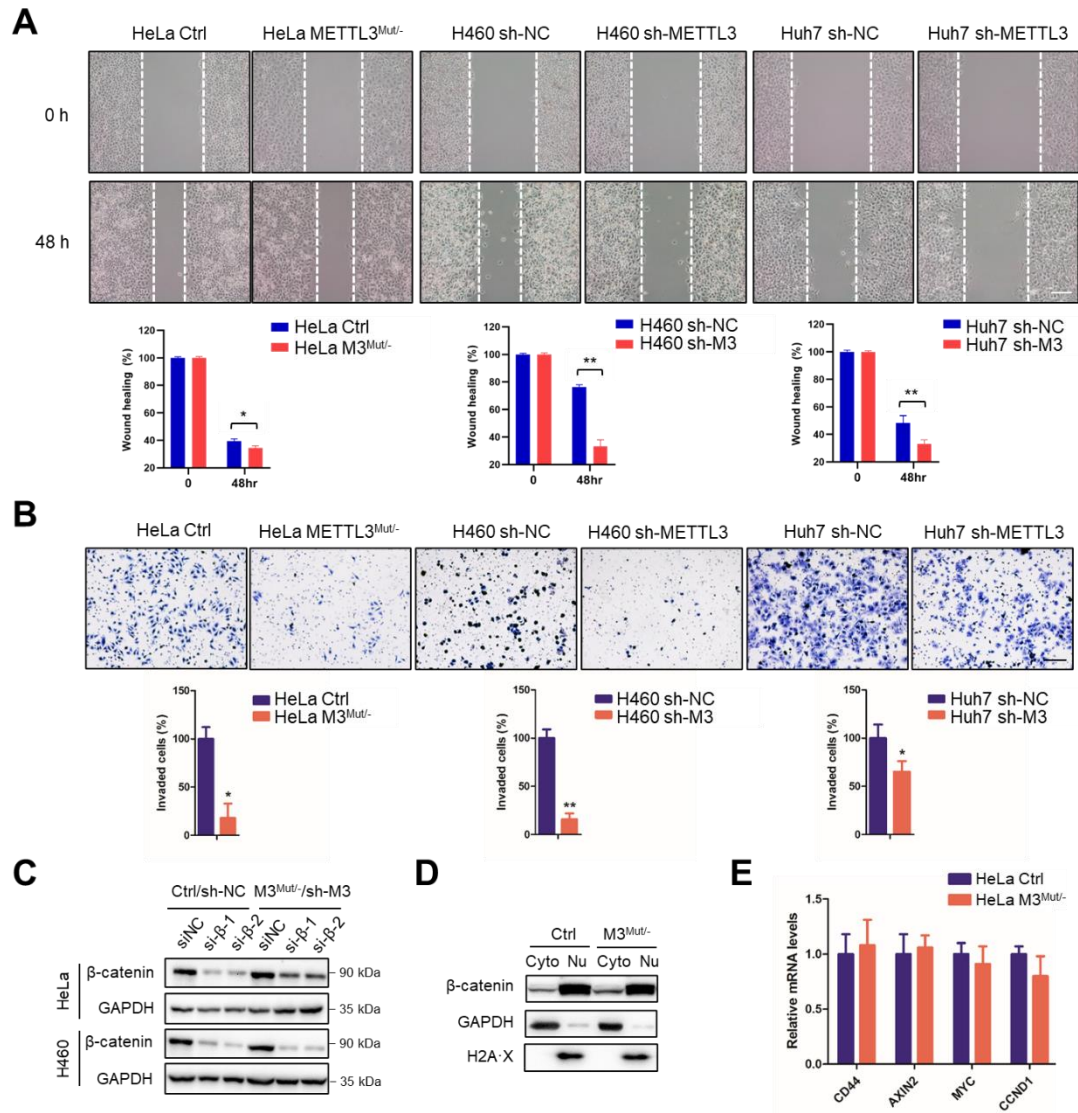

**Fig.S2 METTL3-mediated EMT is independent to Wnt/β-catenin activation in cancer cells.**

- (A) Wound healing of HeLa, HeLa METTL3<sup>Mut/-</sup>, H460 sh-NC, H460 sh-METTL3, Huh7 sh-NC, Huh7 sh-METTL3 cells were recorded and quantitatively analyzed; scale bar, 100μm;
- (B) Cell invasion assays of HeLa, HeLa METTL3<sup>Mut/-</sup>, H460 sh-NC, H460 sh-METTL3, Huh7 sh-NC, Huh7 sh-METTL3 cells were recorded and quantitatively analyzed; scale bar, 100μm;
- (C) Protein levels of β-catenin in HeLa, HeLa METTL3<sup>Mut/-</sup>, H460 sh-NC, H460 sh-METTL3 cells transfected with si-NC or si-β-catenin were detected by Western blot;
- (D) Protein levels of β-catenin in cytoplasmic and nuclear fractions in HeLa and HeLa METTL3<sup>Mut/-</sup> cells;

(E) Expression levels of downstream genes Wnt signaling in HeLa and HeLa METTL3<sup>Mut/-</sup> cells were detected by RT-qPCR.

Data are presented as means  $\pm$  SD from three independent experiments. Student's *t test*, \*,  $p < 0.05$ ; \*\*,  $p < 0.01$  compared with control.

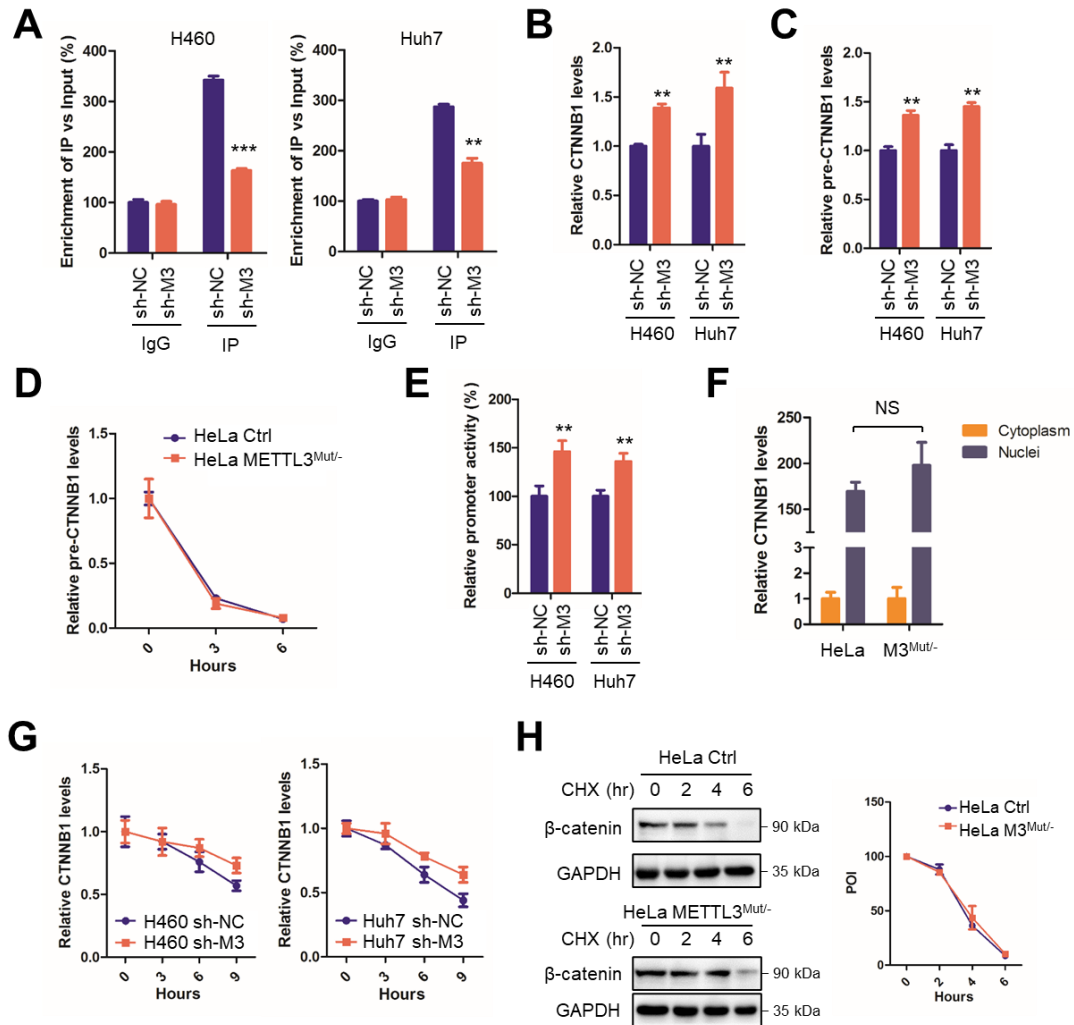

**Fig.S3 METTL3 regulates transcription, stability and translation of *CTNNB1* mRNA in H460 and Huh7 cells.**

- (A) m<sup>6</sup>A RIP-qPCR analysis of *CTNNB1* mRNA in H460 sh-NC and H460 sh-METTL3 cells (*left*), Huh7 sh-NC and Huh7 sh-METTL3 cells (*right*);
- (B-C) Expression level of *CTNNB1* mRNA (B) and precursor mRNA (pre-*CTNNB1*; C) in H460 sh-NC, H460 sh-METTL3, Huh7 sh-NC and Huh7 sh-METTL3 cells were detected by RT-qPCR;
- (D) Expression levels of *CTNNB1* precursor mRNA (pre-*CTNNB1*) in HeLa and HeLa METTL3<sup>Mut/-</sup> cells treated with Act-D were detected by RT-qPCR;
- (E) H460 sh-NC, H460 sh-METTL3, Huh7 sh-NC and Huh7 sh-METTL3 cells were co-transfected with pGL3-Basic-*CTNNB1*-Fluc reporter and pRL-TK plasmids for 24 h. Results were presented as the ratios between the activity of the reporter plasmid and pRL-

TK;

(F) Expression of cytoplasmic or nuclear *CTNNB1* mRNA levels in HeLa and HeLa METTL3<sup>Mut/-</sup> cells were detected by RT-qPCR;

(G) Half-lives of *CTNNB1* mRNA in H460 sh-NC, H460 sh-METTL3, Huh7 sh-NC and Huh7 sh-METTL3 cells were detected by RT-qPCR;

(H) Protein levels of  $\beta$ -catenin in HeLa and HeLa METTL3<sup>Mut/-</sup> cells treated with CHX for indicated priors (*left*). Protein of interest (POI) are quantitatively analyzed (*right*).

Data are presented as means  $\pm$  SD from three independent experiments. Student's *t test*, \*\*,  $p < 0.01$ ; \*\*\*,  $p < 0.001$  compared with control.

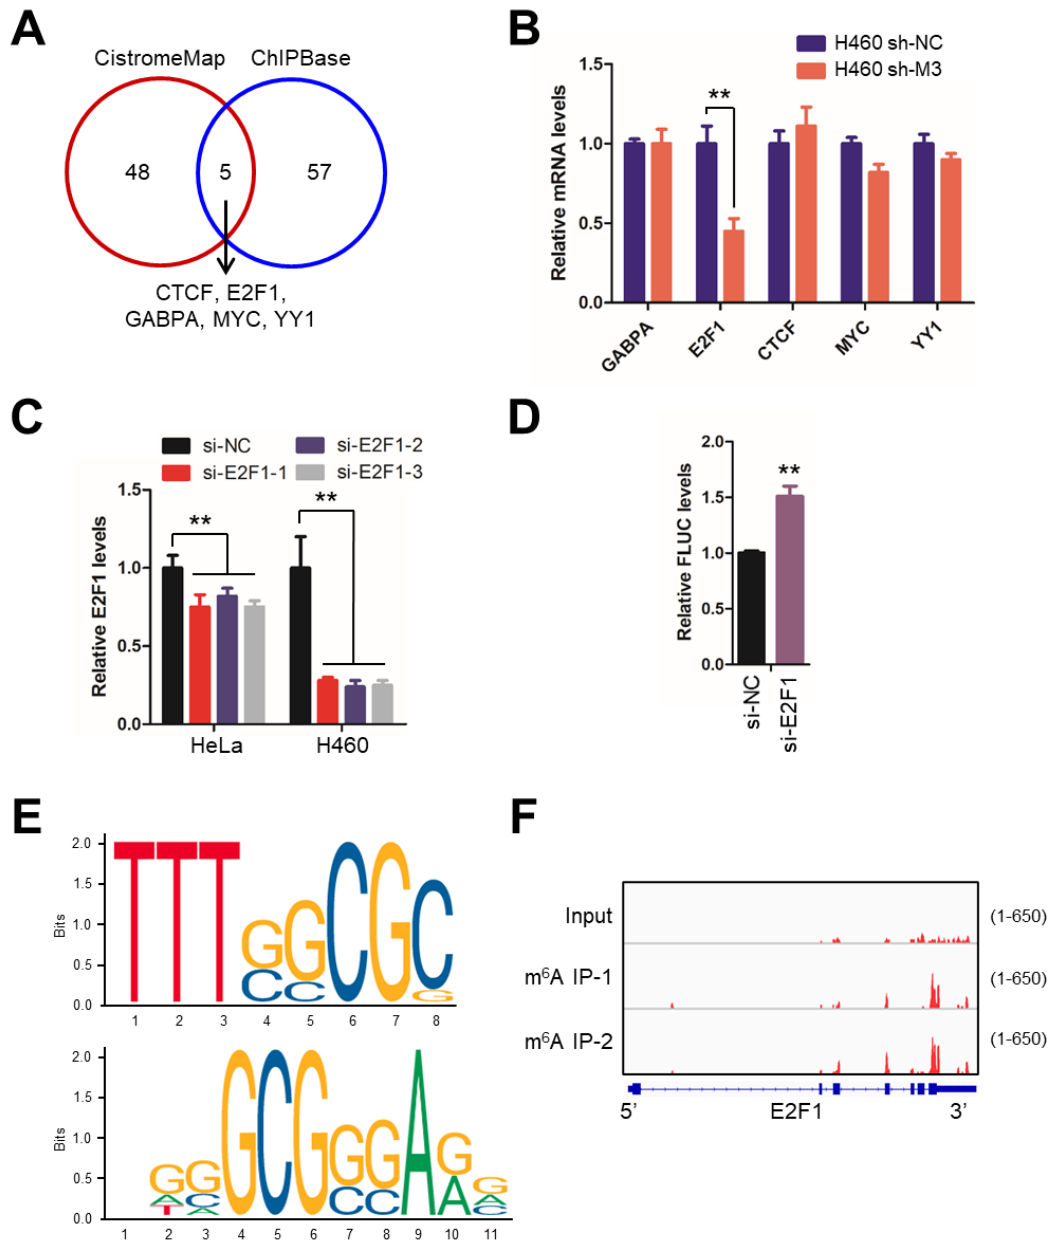

**Fig.S4 E2F1 is identified as transcription factor of *CTNNB1*.**

- (A) Venn diagram shows the overlap of transcription factors of *CTNNB1* predicted by CistromeMap and ChIPBase, respectively;
- (B) Expression levels of predicted transcription factors of *CTNNB1* in H460 sh-NC and H460 sh-METTL3 cells were detected by RT-qPCR;
- (C) Expression levels of *E2F1* mRNA in HeLa and H460 cells silencing *E2F1* were detected by RT-qPCR;
- (D) HeLa cells with or without *E2F1* silencing were transfected with pGL3 reporter containing



*CTNNB1* promoter before *F-LUC* gene for 48 h. Expression levels of *FLUC* mRNA were detected by RT-qPCR, which was normalized to the resistant gene *AmpR* of pGL3 reporter;

(E) The binding motifs of E2F1 analyzed by ChIPBase database;

(F) m<sup>6</sup>A peaks located in *E2F1* mRNA from m<sup>6</sup>A RIP-seq data (Accession code GSE112795).

Data of Fig.4B, 4C, 4E are presented as means  $\pm$  SD from three independent experiments. Student's *t* test, \*\*,  $p < 0.01$  compared with control.

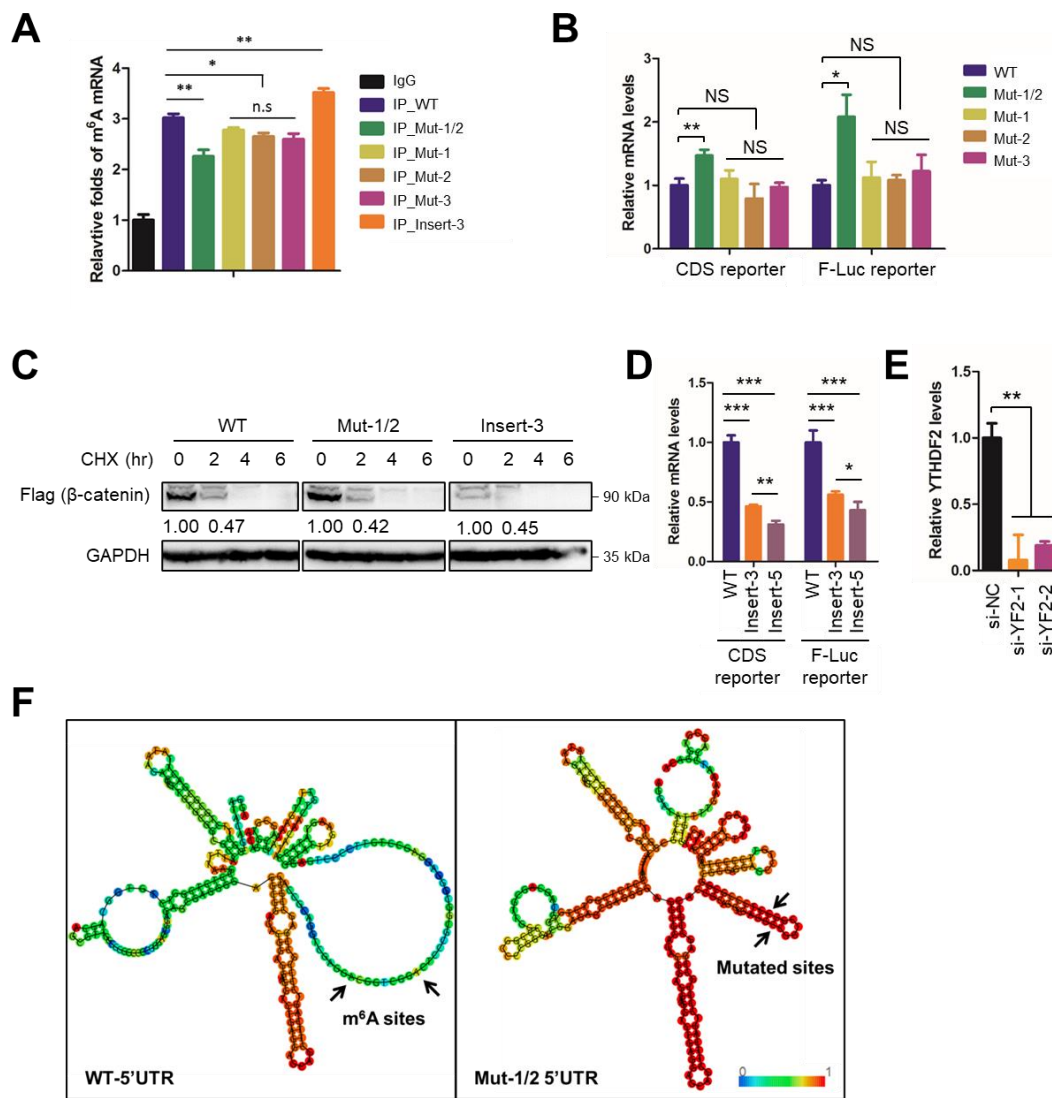

**Fig.S5 5'UTR m<sup>6</sup>A methylation destabilizes *CTNNB1* mRNA.**

- (A) Relative enrichment of m<sup>6</sup>A in wild-type (WT) or mutated CDS reporters were analyzed by m<sup>6</sup>A RIP-qPCR;
- (B) Expression levels of *CTNNB1*-CDS and F-Luc reporter mRNAs in HeLa cells transfected with wild-type (WT) or mutated reporters;
- (C) CDS reporters with mutations were transfected in HeLa cells for 48hr and then treated with CHX for indicated times. Expression levels of exogenous β-catenin (Flag) were detected by Western blot. Band intensities of Flag-β-catenin were analyzed by ImageJ and listed at the bottom of target bands;
- (D) Expression levels of *CTNNB1*-CDS and F-Luc reporter mRNAs in HeLa cells transfected

with wild-type (WT) or m<sup>6</sup>A-inserted reporters;

(E) Expression levels of *YTHDF2* mRNA in HeLa cells silencing *YTHDF2* were detected by RT-qPCR;

(F) The secondary structure of wild type (WT) or Mut-1/2 (GGAC to GGCC in site 1 and site 2 of m<sup>6</sup>A motifs) in *CTNNB1* 5'UTR was predicted by RNAfold WebServer (<http://rna.tbi.univie.ac.at/>). The red color indicates strong confidence for the prediction of each base.

Data of Fig.5A-5E are presented as means  $\pm$  SD from three independent experiments. Student's *t test*, NS, no significant; \*,  $p < 0.05$ ; \*\*,  $p < 0.01$ ; \*\*\*,  $p < 0.001$  compared with control.

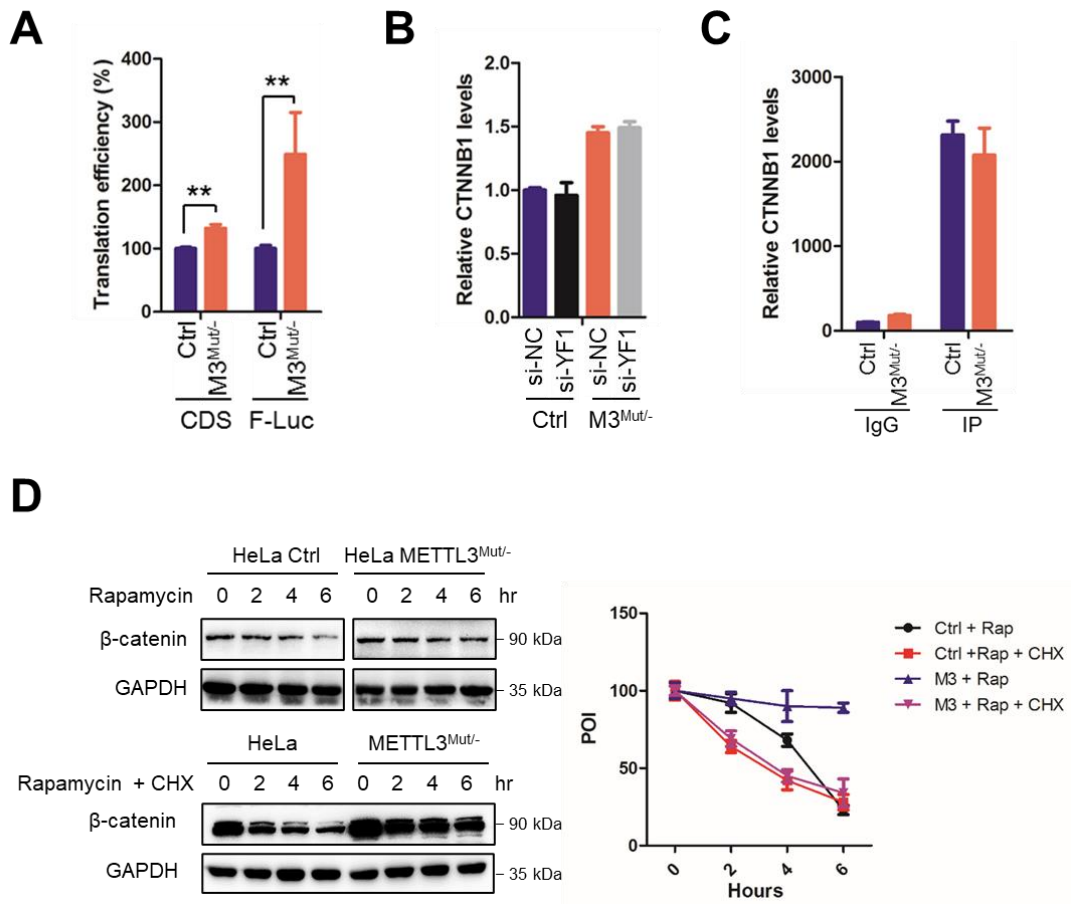

**Fig.S6 METTL3 modulates translation of *CTNNB1*.**

- (A) Translation efficiency of CDS and F-Luc reporters in control and HeLa METTL3<sup>Mut/-</sup> cells were analyzed;
- (B) Expression levels of *CTNNB1* mRNA in HeLa cells silencing *YTHDF1*;
- (C) Control and HeLa METTL3<sup>Mut/-</sup> cells overexpressing β-MS2bs were pull-down by HA-MS2. Expression levels of *CTNNB1* mRNA in IgG control and HA-IP samples were detected by RT-qPCR;
- (D) Expression levels of β-catenin in HeLa cells treated with 50nM rapamycin with or without 100ug/ml cycloheximide (CHX) for indicated time.

Data are presented as means ± SD from three independent experiments. Student's *t* test, \*\*,  $p < 0.01$ , NS, no significant compared with control.

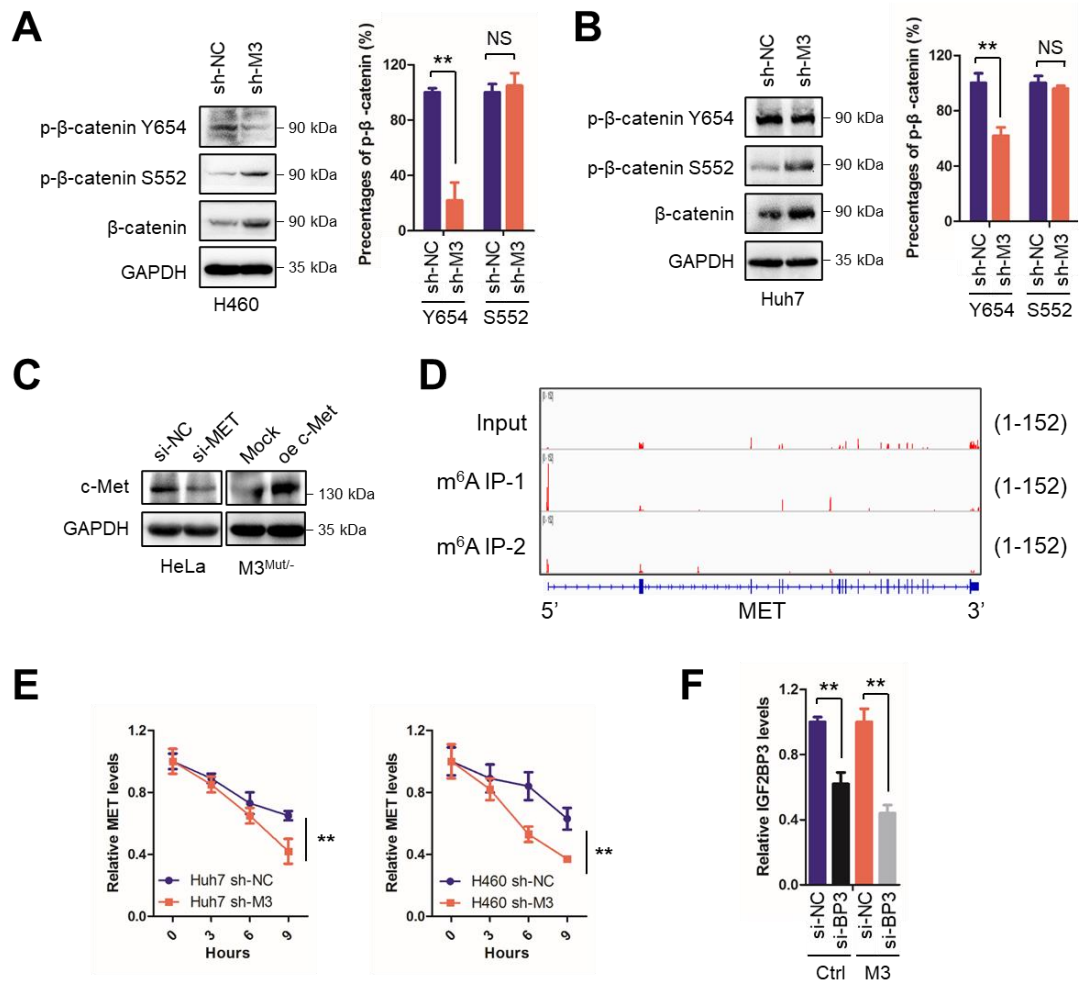

**Fig.S7 METTL3 regulates membrane localization of β-catenin via Met kinase.**

(A) Protein (*left*) and mRNA (*right*) levels of β-catenin and METTL3 in H460 sh-NC and H460 sh-METTL3 cells were detected by Western blot analysis and RT-qPCR, respectively

(B) Protein (*left*) and mRNA (*right*) levels of β-catenin and METTL3 in Huh7 sh-NC and Huh7 sh-METTL3 cells were detected by Western blot analysis and RT-qPCR, respectively;

(C) Expression of c-Met in HeLa cells silencing c-Met and HeLa METTL3<sup>Mut/-</sup> overexpressing c-Met were detected by Western blot analysis;

(D) m<sup>6</sup>A peaks located in *MET* mRNA from m<sup>6</sup>A RIP-seq data (Accession code GSE112795);

(E) Half-lives of *MET* in H460 sh-NC and H460 sh-METTL3 (*left*), Huh7 sh-NC and Huh7 sh-METTL3 (*right*) cells;

(F) Expression levels of *IGF2BP3* mRNA in HeLa (Ctrl) and HeLa METTL3<sup>Mut/-</sup> (M3) cells silencing *IGF2BP3* were detected by RT-qPCR.

Data are presented as means ± SD from three independent experiments. Student's *t* test, \*\*, *p* <

0.01, NS, no significant compared with control.

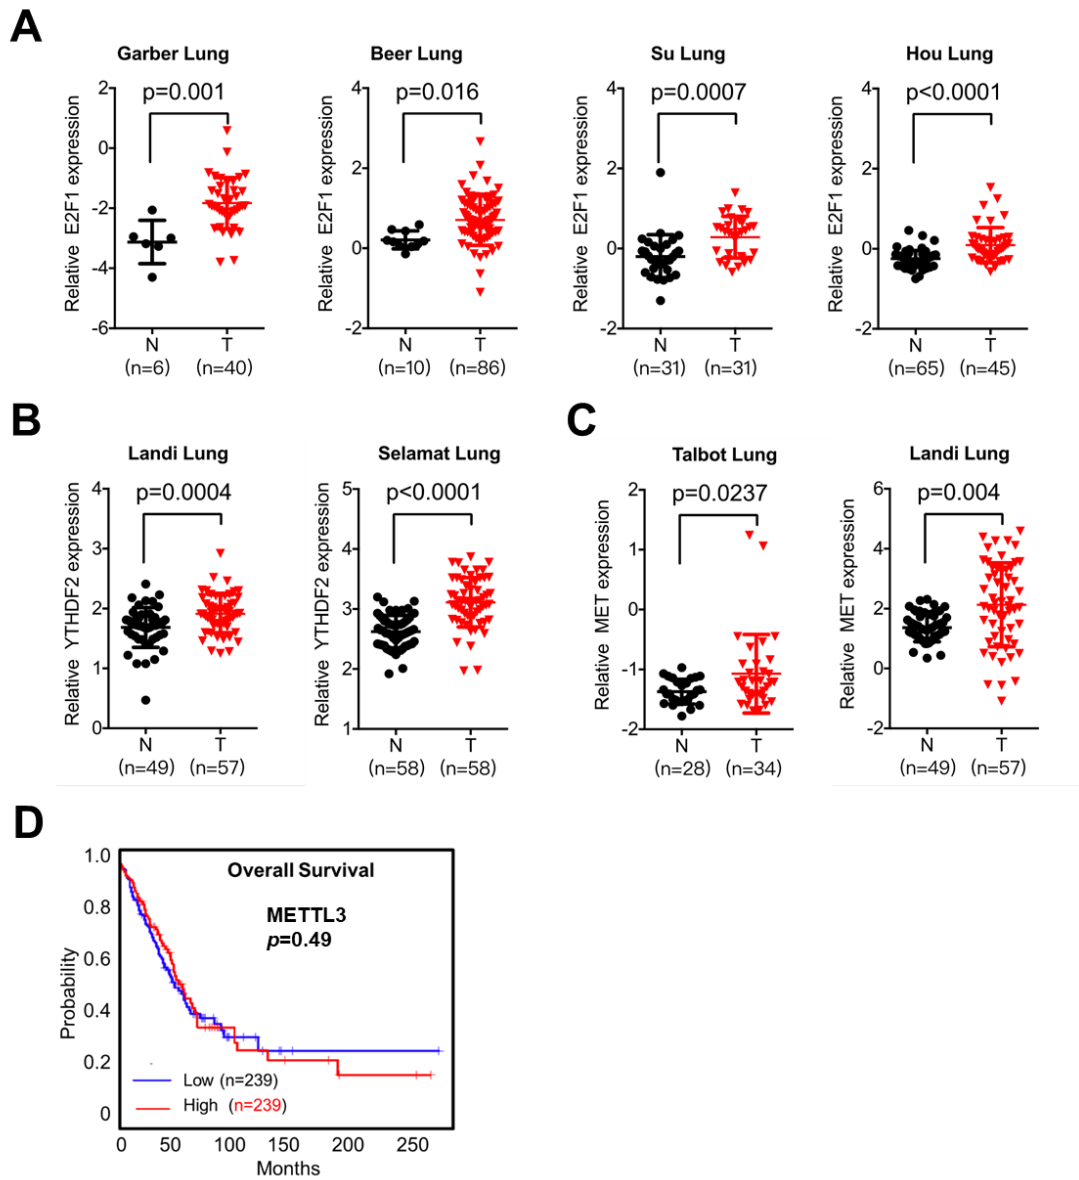

**Fig.S8 Regulators of  $\beta$ -catenin expression are involved in the development of cancer cells.**

- (A) The relative mRNA expression of *E2F1* in lung cancers from Oncomine datasets;
- (B) The relative mRNA expression of *YTHDF2* in lung cancers from Oncomine datasets;
- (C) The relative mRNA expression of *MET* in lung cancers from Oncomine datasets;
- (D) The Kaplan–Meier survival curves of OS based on METTL3 expression in lung cancer patients from TCGA data base.

**Table S1 Sequences for siRNA**

| <b>Name</b>  | <b>Sequences (5' – 3')</b> |
|--------------|----------------------------|
| si-CTNNB1-1  | CCAGACACGCUAUCAUGCGdTdT    |
| si-CTNNB1-2  | UUGGAUUGAUUCGAAAUCUdTdT    |
| si-METTL3-1  | GCACUUGGAUCUACGGAAUdTdT    |
| si-METTL3-2  | CGACUACAGUAGCUGCCUdTdT     |
| si-METTL3-3  | CAGUGGAUCUGUUGUGAUAdTdT    |
| si-E2F1-1    | GCAUCUAUGACAUCACCAAdTdT    |
| si-E2F1-2    | GGACUCUUCGGAGAACUUdTdT     |
| si-E2F1-3    | CCUCUUCGACUGUGACUUdTdT     |
| si-YTHDF1-1  | CCGCGUCUAGUUGUUCAUGAAdTdT  |
| si-YTHDF1-2  | CCUCCACCCAUAAGCAUAdTdT     |
| si-YTHDF2-1  | GCGGGUCCAUAUCUAGUAAAdTdT   |
| si-YTHDF2-2  | GGGCUGAUAUUGCUAGCAAdTdT    |
| si-IGF2BP3-1 | AAUUCUGCAAUGGAGAUAUcTdT    |
| si-IGF2BP3-2 | UUCAUGAUCUCCUCCUCAGCUdTdT  |
| si-MET       | AACATGGCTCTAGTTGTTCGACdTdT |



**Table S2 Primers for RT-qPCR**

| <b>Gene</b>                | <b>Forward (5' - 3')</b>      | <b>Reverse (5' - 3')</b>     |
|----------------------------|-------------------------------|------------------------------|
| <b>CTNNB1</b>              | TGGATTGATTTCGAAATCTTGCC       | GAACAAGCAACTGAACTAGTCCG      |
| <b>pre-CTNNB1</b>          | GCCTTACTGAAAGTCAGAATGC        | AACACTCACTATCCACAGTTCA       |
| <b>CTNNB1<br/>5'UTR</b>    | TGGATTGATTTCGAAATCTTGCC       | GAACAAGCAACTGAACTAGTCCG      |
| <b>CTNNB1<br/>3'UTR</b>    | TGGGTAGGGTAAATCAGTAAGA<br>GGT | AGCATCGTATCACAGCAGGT         |
| <b>CDH1</b>                | GCCTCCTGAAAAGAGAGTGGA<br>AG   | TGGCAGTGTCTCTCCAAATCCG       |
| <b>FN1</b>                 | ACAACACCGAGGTGACTGAGA<br>C    | GGACACAACGATGCTTCCTGAG       |
| <b>METTL3</b>              | CTATCTCCTGGCACTCGCAAGA        | GCTTGAACCGTGCAACCACATC       |
| <b>GABPA</b>               | GTGCACAGAAGAAAGCATTGTA        | ACACTGTAGTCTTGGTTCTAGC       |
| <b>E2F1</b>                | ATAGTGTACCACCACCATCAT         | GAAAGGCTGATGAACTCCTCAG       |
| <b>CTCF</b>                | TTAAAACGTACATTCGCTCTC         | TCATAAGGCTTTTCCCCTGAAT       |
| <b>MYC</b>                 | CGACGAGACCTTCATCAAAAAC        | CTTCTCTGAGACGAGCTTGG         |
| <b>YY1</b>                 | CCCACGGTCCCAGAGTCCAC          | AAAGCGTTTCCCACAGCCTTCG       |
| <b>CTNNB1<br/>promoter</b> | GCTATGGTGACAGACGGCAGTT<br>G   | TCATGTTTCAGGGCCAGCGTATT<br>C |
| <b>FLUC</b>                | GGCCTGACAGAAACAACCAG          | AAGTCCACCACCTTAGCCTC         |
| <b>RLUC</b>                | CGCTATTGTCGAGGGAGCTA          | GCTCCACGAAGCTCTTGATG         |
| <b>AmpR</b>                | CCGGCGTCAATACGGGATAA          | TCCTTGAGAGTTTTTCGCCCC        |
| <b>GAPDH</b>               | GTCTCCTCTGACTTCAACAGCG        | ACCACCCTGTTGCTGTAGCCAA       |
| <b>18S</b>                 | CGGACAGGATTGACAGATTGAT<br>AGC | TGCCAGAGTCTCGTTCGTTATCG      |
| <b>HPRT</b>                | TGACACTGGCAAACAATGCA-         | GGTCCTTTTCACCAGCAAGCT        |
| <b>EIF4E1</b>              | AGGATGGTATTGAGCCTATGTG        | GTCTCTGCTGTTTGTTCAATGT       |
| <b>EIF4E3</b>              | CCAAGGACAGCACGTCCACAG         | CATCTGCTGCGGCACAGTCTG        |
| <b>FOXP3</b>               | AAGAACGCCATCCGCCACAAC         | TCCAGCTCATCCACGGTCCAC        |
| <b>ZNF191</b>              | AGCGATTCAGGCAGTTTGGAA         | CTTTTGTGTGCGTCTCTGGC         |
| <b>ZBP-89</b>              | GAAACAACGTTCTCCCGCAAA         | TTGCTCCAGTGGCTGTTTCA         |
| <b>PWWP2A</b>              | ACCCTTCTCCTGTCCCGCATC         | GGAGGTGGCTGAGGTATTGATTG<br>G |
| <b>YTHDF1</b>              | TGGATGATGCTGCTGGTTGT          | CAACGGTCCCTCATTCCACA         |
| <b>YTHDF2</b>              | AGCCTCTTGGAGCAGTACAAA         | GCATTATTGGGCCTTGCCTG         |
| <b>MET</b>                 | ATCAGGAGGTGTTTGGAAAGAT        | CGACTGTATGTCAGCAGTATGA       |
| <b>CD44</b>                | CACACCTCCCCTCATTCAC           | AGGTCCTGCTTTCCCTTCGTG        |
| <b>AXIN2</b>               | CTCCGAGCTCACACTCAATTC         | GACAGGTGATCGTCCAGTATC        |
| <b>CCND1</b>               | TACCGCCTCACACGCTTCCTC         | ACCTCCTCCTCCTCCTCCTCCTC      |

**Table S3 Primers for PCR**

| <b>Name</b>          | <b>Forward (5' – 3')</b> | <b>Reverse (5' – 3')</b> | <b>Remarks</b>            |
|----------------------|--------------------------|--------------------------|---------------------------|
| <b>pcDNA3_5'U</b>    | GGGGTACCAGGATACA         | CGGGATCCTGTCCACG         | Cloning CTNNB1            |
| <b>TRctnnb1</b>      | GCGGCTTC                 | CTGGATT                  | 5'UTR to pcDNA3           |
| <b>pGL3-</b>         | GGGGTACCTTGCGGCC         | CCAAGCTTTTCTCGAG         | Cloning CTNNB1            |
| <b>PROMctnnb1</b>    | GCGGATCTCACTGAAC         | GCCGCCACCGGCGCAG         | promoter to pGL3-         |
|                      | ATCATC                   | C                        | basic                     |
| <b>pGL3_5UTRc</b>    | GGCTCGAGAGGATACA         | CGAAGCTTTGTCCACG         | Cloning CTNNB1            |
| <b>tnnb1</b>         | GCGGCTTC                 | CTGGATTTTCAAAAC          | 5'UTR to pGL3-            |
|                      |                          |                          | basic                     |
| <b>5UTR mut3_</b>    | AATCCAGCGTGGCCA          | GCCAAGCTTTGGCCAC         | $\beta$ -catenin mutant 1 |
| <b>pGL</b>           | AAGCTT GGC               | GCTGGATT                 | in pGL3-basic             |
| <b>5UTR mut3_</b>    | AATCCAGCGTGGCCA          | TGGGGATCCTGGCCAC         | $\beta$ -catenin mutant 1 |
| <b>pcD</b>           | GGATCCCCA                | GCTGGATT                 | in pcDNA3                 |
| <b>5UTR mut2</b>     | AGGACGGTCGGCCTCC         | GCCGCGGGAGGCCGA          | $\beta$ -catenin mutant 2 |
|                      | CGCGGC                   | CCGTCCT                  |                           |
| <b>5UTR mut3</b>     | CGCAGGTCGAGGCCG          | GAGTCCGACCGGCCTC         | $\beta$ -catenin mutant 3 |
|                      | GTCGGACTC                | GACCTGCG                 |                           |
| <b>5UTR mut2/3</b>   | CAGGTCGAGGCCGGT          | CCGCGGGAGGCCGAC          | $\beta$ -catenin mutant   |
|                      | CGGCCTCCCGCGG            | CGGCCTCGACCTG            | 2/3                       |
| <b>5UTR ctrl</b>     | CGGCGGGAGGGCCT           | CAGGGGAACAGGCC           | $\beta$ -catenin mutant   |
|                      | GTTCCCCTG                | CTCCCGCCG                | control                   |
| <b>5UTR insert-3</b> | CAGGTCGAGGACGGA          | CCGCGGGAGTCCGTCC         | $\beta$ -catenin mutant   |
|                      | CGGACTCCCGCGG            | GTCCTCGACCTG             | Insert-3                  |
| <b>5UTR insert-5</b> | AGCGGAGAGCGAGGG          | GGGGACTGAAGCTGGT         | $\beta$ -catenin mutant   |
|                      | GACGCGGACACGGAC          | CCTCAGTCCTTCGTCC         | Insert-5                  |
|                      | GAAGGACTGAGGACC          | GTGTCCGCGTCCCCTC         |                           |
|                      | AGCTTCAGTCCCC            | GCTCTCCGCT               |                           |
